# Supplementary material for: Suitable transfection methods for single particle tracing in plant suspension cells
Source: PubMed Central journal article supplement (PMC4076440; doi:10.1186/1746-4811-10-15), 2014-05-31
Supplement: 1746-4811-10-15-S2.pdf [file 1746-4811-10-15-S2.pdf]

**A**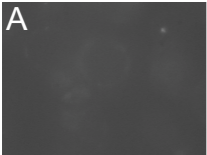**PEG****B**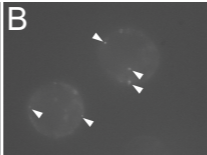**PEG + MB****C**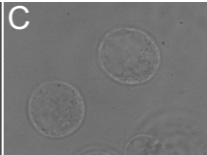**PEG + MB (TM)**
